# Supplementary material
Source: Research Square preprint supplement (doi:10.21203/rs.3.rs-9297386/v1)
Supplement: Supplementary file 1 [file 2b938a014f239919ff22ee3c.docx]

**Supplementary table 1. The 48 cases of maternal CNVs involving Xq28 recurrent region detected by NIPT**

| Sample ID |  |  | | NIPT results | | | | |
| --- | --- | --- | --- | --- | --- | --- | --- | --- |
| Region | Del/dup | Size (bp) | | Classification | Number of HI/TS score=3 regions involved | Number of HI/TS score=3 genes involved | Pathogenicity |
| MB-001 | chrX:154,096,928-154,588,175 | Del | 491,247 | | Microdeletion | 1 | 2 | Pathogenic |
| MB-002 | chrX:139,546,298-154,888,921 | Del | 15,342,623 | | Partial aneuploidy | 1 | 15 | Pathogenic |
| MB-003 | chrX:152,169,986-154,926,263 | Del | 2,756,277 | | Microdeletion | 1 | 10 | Pathogenic |
| MB-004 | chrX:146,683,185-154,899,639 | Del | 8,216,454 | | Microdeletion | 1 | 15 | Pathogenic |
| MB-005 | chrX:154,026,037-154,154,089 | Del | 128,052 | | Microdeletion | 1 | 1 | Pathogenic |
| MB-006 | chrX:147,132,282-154,899,639 | Del | 7,767,357 | | Microdeletion | 1 | 14 | Pathogenic |
| MB-007 | chrX:153,642,445-154,899,639 | Del | 1,257,194 | | Microdeletion | 1 | 3 | Pathogenic |
| MB-008 | chrX:153,839,968-154,926,263 | Del | 1,086,295 | | Microdeletion | 1 | 2 | Pathogenic |
| MB-009 | chrX:154,042,163-154,926,263 | Del | 884,100 | | Microdeletion | 1 | 2 | Pathogenic |
| MB-010 | chrX:149,128,392-154,899,639 | Del | 5,771,247 | | Microdeletion | 1 | 12 | Pathogenic |
| MB-011 | chrX:149,142,851-154,899,639 | Del | 5,756,788 | | Microdeletion | 1 | 12 | Pathogenic |
| MB-012 | chrX:150,845,797-154,899,639 | Del | 4,053,842 | | Microdeletion | 1 | 11 | Pathogenic |
| MB-013 | chrX:154,120,448-154,574,370 | Del | 453,922 | | Microdeletion | 1 | 2 | Pathogenic |
| MB-014 | chrX:154,131,826-154,563,405 | Del | 431,579 | | Microdeletion | 1 | 2 | Pathogenic |
| MB-015 | chrX:154,131,826-154,574,370 | Dup | 442,544 | | Microduplication | 1 | 0 | Pathogenic |
| MB-016 | chrX:154,102,121-154,618,813 | Dup | 516,692 | | Microduplication | 1 | 0 | Pathogenic |
| MB-017 | chrX:154,120,448-154,588,175 | Dup | 467,727 | | Microduplication | 1 | 0 | Pathogenic |
| MB-018 | chrX:154,102,121-154,568,947 | Dup | 466,826 | | Microduplication | 1 | 0 | Pathogenic |
| MB-019 | chrX:154,109,644-154,926,263 | Dup | 816,619 | | Microduplication | 1 | 0 | Pathogenic |
| MB-020 | chrX:154,096,928-154,846,190 | Dup | 749,262 | | Microduplication | 1 | 0 | Pathogenic |
| MB-021 | chrX:154,102,121-154,580,145 | Dup | 478,024 | | Microduplication | 1 | 0 | Pathogenic |
| MB-022 | chrX:154,125,774-154,563,405 | Del | 437,631 | | Microdeletion | 1 | 2 | Pathogenic |
| MB-023 | chrX:154,086,190-154,568,947 | Del | 482,757 | | Microdeletion | 1 | 2 | Pathogenic |
| MB-024 | chrX:61,682,012-154,926,263 | Del | 93,244,251 | | Partial aneuploidy | 1 | 62 | Pathogenic |
| MB-025 | chrX:97,543,035-154,926,263 | Del | 57,383,228 | | Partial aneuploidy | 2 | 42 | Pathogenic |
| MB-026 | chrX:99,157,465-154,926,263 | Del | 55,768,798 | | Partial aneuploidy | 2 | 42 | Pathogenic |
| MB-027 | chrX:154,125,774-154,580,145 | Dup | 454,371 | | Microduplication | 1 | 0 | Pathogenic |
| MB-028 | chrX:154,114,860-154,588,175 | Dup | 473,315 | | Microduplication | 1 | 0 | Pathogenic |
| MB-029 | chrX:154,086,190-154,899,639 | Dup | 813,449 | | Microduplication | 1 | 0 | Pathogenic |
| MB-030 | chrX:152,850,674-154,899,639 | Dup | 2,048,965 | | Microduplication | 3 | 0 | Pathogenic |
| MB-031 | chrX:152,840,527-154,339,448 | Dup | 1,498,921 | | Microduplication | 3 | 0 | Pathogenic |
| MB-032 | chrX:154,225,339-154,926,263 | Dup | 700,924 | | Microduplication | 1 | 0 | Pathogenic |
| MB-033 | chrX:154,131,826-154,926,263 | Del | 794,437 | | Microdeletion | 1 | 2 | Pathogenic |
| MB-034 | chrX:153,947,738-154,899,639 | Del | 951,901 | | Microdeletion | 1 | 2 | Pathogenic |
| MB-035 | chrX:152,840,527-154,894,334 | Dup | 2,053,807 | | Microduplication | 3 | 0 | Pathogenic |
| MB-036 | chrX:152,840,527-154,899,639 | Dup | 2,059,112 | | Microduplication | 3 | 0 | Pathogenic |
| MB-037 | chrX:154,169,987-154,385,149 | Dup | 215,162 | | Microduplication | 1 | 0 | VOUS |
| MB-038 | chrX:154,049,476-154,926,263 | Del | 876,787 | | Microdeletion | 1 | 2 | Pathogenic |
| MB-039 | chrX:147,061,723-154,899,639 | Del | 7,837,916 | | Microdeletion | 1 | 14 | Pathogenic |
| MB-040 | chrX:154,114,860-154,580,145 | Del | 465,285 | | Microdeletion | 1 | 2 | Pathogenic |
| MB-041 | chrX:154,086,190-154,926,263 | Del | 840,073 | | Microdeletion | 1 | 2 | Pathogenic |
| MB-042 | chrX:147,051,368-154,899,639 | Del | 7,848,271 | | Microdeletion | 1 | 24 | Pathogenic |
| MB-043 | chrX:154,091,847-154,618,813 | Del | 526,966 | | Microdeletion | 1 | 2 | Pathogenic |
| MB-044 | chrX:153,999,779-154,580,145 | Del | 580,366 | | Microdeletion | 1 | 2 | Pathogenic |
| MB-045 | chrX:153,828,020-154,154,089 | Dup | 326,069 | | Microduplication | 1 | 0 | VOUS |
| MB-046 | chrX:154,102,121-154,648,428 | Dup | 546,307 | | Microduplication | 1 | 0 | Pathogenic |
| MB-047 | chrX:140,935,043-154,899,639 | Del | 13,964,596 | | Partial aneuploidy | 1 | 15 | Pathogenic |
| MB-048 | chrX:154,120,448-154,588,175 | Dup | 467,727 | | Microduplication | 1 | 0 | Pathogenic |

Dup, duplication; Del, deletion; CNV, copy number variation; NIPT, noninvasive prenatal testing; HI, haploinsufficiency; TS, triplosensitivity.
